# Supplementary material
Source: PubMed Central journal article supplement (PMC6512257)
Supplement: jamaoncol-5-635-s001.pdf [file jamaoncol-5-635-s001.pdf]

## Supplementary Online Content

Conant EF, Barlow WE, Herschorn SD, et al. Association of digital breast tomosynthesis vs digital mammography with cancer detection and recall rates by age and breast density. *JAMA Oncol*. Published online February 28, 2019. doi:10.1001/jamaoncol.2018.7078

**eTable 1.** Screening Examination Characteristics

**eTable 2.** Description of Detected Invasive Cancers

This supplementary material has been provided by the authors to give readers additional information about their work.

**eTable 1. Screening Examination Characteristics**

|                               |                                     | Digital mammography (DM) | Digital breast tomosynthesis (DBT) | Total           |
|-------------------------------|-------------------------------------|--------------------------|------------------------------------|-----------------|
| <b>N (row %)</b>              | N screens                           | 129,369 (71.7%)          | 50,971 (28.3%)                     | 180,340         |
| <b>Research Center</b>        | Dartmouth/Brigham and Women's Hosp. | 62,062 (48.0%)           | 11,848 (23.2%)                     | 73,910 (41.0%)  |
|                               | University of Pennsylvania          | 2,978 (2.3%)             | 20,228 (39.7%)                     | 23,206 (12.9%)  |
|                               | University of Vermont               | 64,329 (49.7%)           | 18,895 (37.1%)                     | 83,224 (46.1%)  |
| <b>Age</b>                    | Mean                                | 56.4 years               | 54.6 years                         | 55.9 years      |
| <b>Age categories (col %)</b> | 40-49                               | 33,084 (25.6%)           | 16,826 (33.0%)                     | 49,910 (27.7%)  |
|                               | 50-64                               | 68,231 (52.7%)           | 25,797 (50.6%)                     | 94,028 (52.1%)  |
|                               | 65-74                               | 28,054 (21.7%)           | 8,348 (16.4%)                      | 36,402 (20.2%)  |
| <b>Breast density (col %)</b> | Not dense                           | 85,275 (65.9%)           | 30,901 (60.6%)                     | 116,176 (64.4%) |
|                               | Dense                               | 44,094 (34.1%)           | 20,070 (39.4%)                     | 64,164 (35.6%)  |
| <b>Screening exam</b>         | First                               | 8,734 (6.8%)             | 5,246 (10.3%)                      | 13,980 (7.8%)   |
|                               | Subsequent                          | 120,635 (93.2%)          | 45,725 (89.7%)                     | 166,360 (92.2%) |

**eTable 2.** Description of Detected Invasive Cancers†

|            | Age   | Total cancers (DCIS + Invasive) | Invasive Cancers N (%) | Poor Prognosis* | Node positive | Her2 positive | Hormone receptor positive | Size  |        |       | Grade (row %) |       |       |
|------------|-------|---------------------------------|------------------------|-----------------|---------------|---------------|---------------------------|-------|--------|-------|---------------|-------|-------|
|            |       |                                 |                        |                 |               |               |                           | <1 cm | 1-2 cm | 2+ cm | 1             | 2     | 3     |
| <b>DM</b>  | 40-49 | 71                              | 47 (66.2%)             | 40.4%           | 25.5%         | 17.1%         | 91.1%                     | 31.8% | 40.9%  | 27.3% | 25.0%         | 47.7% | 27.3% |
|            | 50-64 | 217                             | 168 (77.4%)            | 35.1%           | 20.2%         | 13.0%         | 87.8%                     | 45.7% | 32.3%  | 22.0% | 24.0%         | 50.0% | 26.0% |
|            | 65-74 | 134                             | 112 (83.6%)            | 31.3%           | 14.4%         | 19.0%         | 81.1%                     | 39.3% | 42.0%  | 18.8% | 26.4%         | 41.5% | 32.1% |
|            | Total | 422                             | 327 (77.5%)            | 34.6%           | 19.0%         | 15.6%         | 85.9%                     | 41.6% | 36.9%  | 21.6% | 25.0%         | 46.8% | 28.2% |
| <b>DBT</b> | 40-49 | 38                              | 28 (73.7%)             | 25.0%           | 14.3%         | 15.4%         | 88.9%                     | 53.6% | 25.0%  | 21.4% | 12.0%         | 56.0% | 32.0% |
|            | 50-64 | 63                              | 44 (69.8%)             | 29.6%           | 6.8%          | 15.0%         | 90.7%                     | 41.9% | 44.2%  | 14.0% | 21.6%         | 59.5% | 18.9% |
|            | 65-74 | 38                              | 27 (71.0%)             | 22.2%           | 15.4%         | 9.1%          | 84.0%                     | 59.3% | 25.9%  | 14.8% | 30.4%         | 65.2% | 4.4%  |
|            | Total | 99                              | 139 (71.2%)            | 26.3%           | 11.2%         | 13.6%         | 88.4%                     | 50.0% | 33.7%  | 16.3% | 21.2%         | 60.0% | 18.8% |

\* Defined as demonstrating any of the following characteristics: (1) metastases; (2) positive nodes; (3) HER2-positive and tumor size ≥ 1 cm; (4) hormone receptor-negative (both ER- and PR-) and tumor size ≥ 1 cm; (5) hormone receptor-positive (ER+ or PR+) and tumor size ≥ 2 cm.

†Restricted to cancers with complete cancer characteristic data from cancer registry files.
